# Supplementary material
Source: publisher figshare collection journal article supplement (https://future-science-group.figshare.com/ndownloader/files/34674388)
Supplement: Supplementary file 1 [file 34674388]

**Supplementary Materials**

Supplementary Figure S1. Sensitivity analysis of the RR of pericardial effusion.

CI, confidence interval; RR, relative risk.

Supplementary Figure S2. Sensitivity analysis of the RR of cardiac tamponade.

CI, confidence interval; RR, relative risk.

Supplementary Figure S3. Cochrane risk-of-bias assessment of the included studies.

(A) Risk of bias graph. (B) Risk of bias summary.

Supplementary Figure S4. Funnel plot regarding the RR of pericardial effusion.

RR, relative risk.

Supplementary Figure S5. Funnel plot regarding the RR of cardiac tamponade.

RR, relative risk.

Supplementary Figure S6. Egger’s test regarding the RR of pericardial effusion.

CI, confidence interval; RR, relative risk; SND, standard normal deviate.

Supplementary Figure S7. Egger’s test regarding the RR of cardiac tamponade.

CI, confidence interval; RR, relative risk; SND, standard normal deviate.

Supplementary Figure S8. Forest plot of the single arm meta-analysis of pericardial effusion associated with (A) PD-1/PD-L1 inhibitors and (B) chemotherapy. CI, confidence interval.

Supplementary Figure S9. Forest plot of the single arm meta-analysis of pericardial effusion associated with PD-1/PD-L1 inhibitors monotherapy, subgroup analysis according to the line of therapy. CI, confidence interval.

Supplementary Figure S10. Forest plot of the single arm meta-analysis of pericardial effusion associated with PD-1 inhibitors monotherapy. CI, confidence interval.

Supplementary Figure S11. Forest plot of the single arm meta-analysis of pericardial effusion associated with PD-L1 inhibitors monotherapy. CI, confidence interval.

Supplementary Figure S12. Forest plot of the single arm meta-analysis of pericardial effusion associated with PD-1/L1 inhibitors combined with chemotherapy. CI, confidence interval.

Supplementary Figure S13. Forest plot of the single arm meta-analysis of cardiac tamponade associated with (A) PD-1/PD-L1 inhibitors and (B) chemotherapy. CI, confidence interval.

Supplementary Figure S14. Forest plot of the single arm meta-analysis of cardiac tamponade associated with PD-1/PD-L1 inhibitors monotherapy, subgroup analysis according to the line of therapy. CI, confidence interval.

Supplementary Figure S15. Forest plot of the single arm meta-analysis of cardiac tamponade associated with PD-1 inhibitors monotherapy. CI, confidence interval.

Supplementary Figure S16. Forest plot of the single arm meta-analysis of cardiac tamponade associated with PD-L1 inhibitors monotherapy. CI, confidence interval.

Supplementary Figure S17. Forest plot of the single arm meta-analysis of cardiac tamponade associated with PD-1/L1 inhibitors combined with chemotherapy. CI, confidence interval.
